# Supplementary material
Source: HighWire-hosted journal article supplement (https://jnm.snmjournals.org/highwire/filestream/95028/field_highwire_adjunct_files/0/178665_Supplemental_Data.pdf)
Supplement: 178665_Supplemental_Data.pdf [file 178665_Supplemental_Data.pdf]

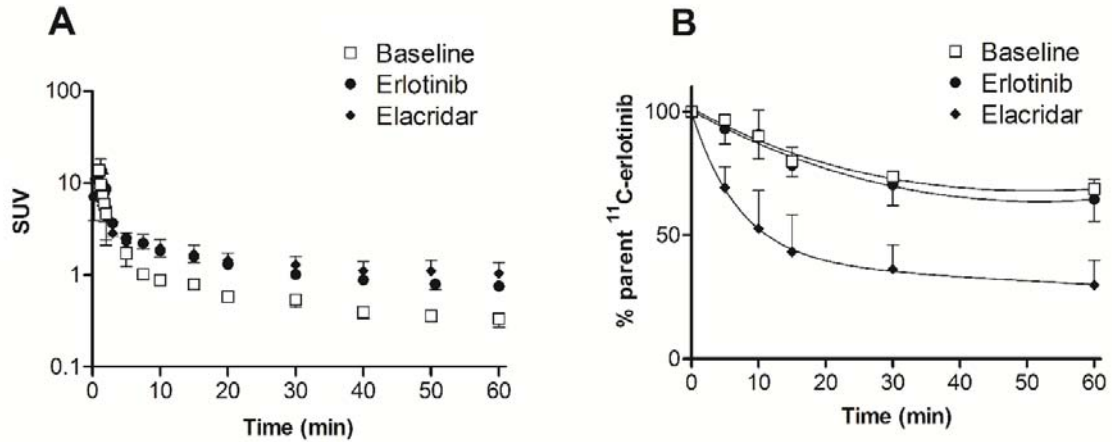

**SUPPLEMENTAL FIGURE 1.** Time-activity curves (mean SUV  $\pm$  1 SD) of total radioactivity in plasma after <sup>11</sup>C-erlotinib injection for baseline ( $n = 4$ ), high-dose erlotinib-treated ( $n = 4$ ) and elacridar-treated ( $n = 3$ ) baboons (A). The percentage of unmetabolized parent <sup>11</sup>C-erlotinib in plasma vs. time, fitted using a 2-exponential decay curve, is shown in B.

s

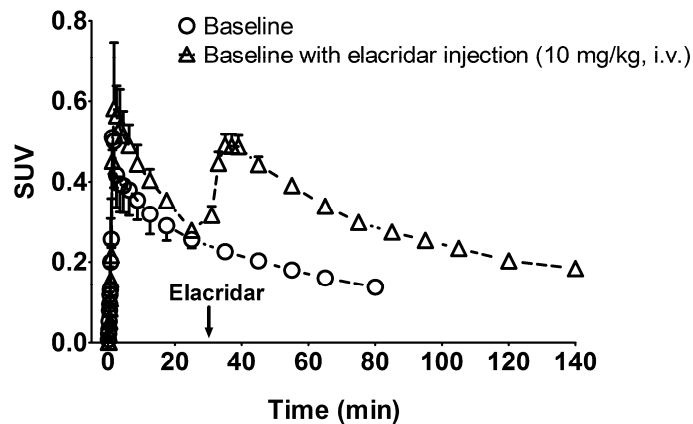

**SUPPLEMENTAL FIGURE 2.** Time-activity curves (mean SUV  $\pm$  1 SD) in whole brain of female FVB mice after injection of <sup>11</sup>C-erlotinib. Shown are baseline PET scans (circles,  $n = 4$ ) and scans in which elacridar (10 mg/kg) was administered as an i.v. bolus over 1 min at 30 min after <sup>11</sup>C-erlotinib injection (triangles,  $n = 3$ ). The time point of elacridar administration is indicated by an arrow.

**SUPPLEMENTAL TABLE 1.** Total Volume of Distribution ( $V_T$ ) Values of <sup>11</sup>C-Erlotinib in Whole Brain and Temporal Muscle Surrounding the Skull for Baseline, High-Dose Erlotinib-Treated (10 mg/kg/h) and Elacridar-Treated (12 mg/kg/h) Animals

|                 | Brain $V_T$ (mL/cm <sup>3</sup> ) |           |           | Muscle $V_T$ (mL/cm <sup>3</sup> ) |           |           |
|-----------------|-----------------------------------|-----------|-----------|------------------------------------|-----------|-----------|
|                 | Baseline                          | Erlotinib | Elacridar | Baseline                           | Erlotinib | Elacridar |
| <b>Baboon 1</b> | 0.22                              | 0.42      | 1.02      | 1.00                               | 1.01      | 0.98      |
| <b>Baboon 2</b> | 0.23                              | 0.35      | 0.79      | 0.86                               | 1.04      | 1.08      |
|                 | 0.23                              | 0.36      | 0.61      | 0.74                               | 1.12      | 0.71      |
| <b>Baboon 3</b> | 0.20                              | 0.38      | -         | 0.86                               | 0.98      | -         |
